# Supplementary material for: An improved multivariable integrated evaluation method and tool (MVIETool) v1.0 for multimodel intercomparison
Source: Copernicus journal article supplement (doi:10.5194/gmd-14-3079-2021), 2021-05-28
Supplement: Supplementary file 1 [file gmd-14-3079-2021-supplement.zip]

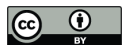

*Supplement of*

## **An improved multivariable integrated evaluation method and tool (MVIETool) v1.0 for multimodel intercomparison**

**Meng-Zhuo Zhang et al.**

*Correspondence to:* Zhongfeng Xu (xuzhf@tea.ac.cn)

- gmd-14-3079-2021-supplement-title-page.pdf
- Cal-M\_SD.zip
- Introduction.txt
- MVIETool(v1.0)-NCL.zip
- MVIETool(v1.0)-Python3.zip
- code\_data\_example-NCL.zip
- code\_data\_example-Python3.zip

The copyright of individual parts of the supplement might differ from the article licence.
