# Supplementary material for: An improved multivariable integrated evaluation method and tool (MVIETool) v1.0 for multimodel intercomparison
Source: Copernicus journal article supplement (doi:10.5194/gmd-14-3079-2021), 2021-05-28
Supplement: Supplementary file 3 [file gmd-14-3079-2021-supplement.zip]

# MVIETool v1.0 User Guide

*NCL version & Python3 version*

Meng-Zhuo Zhang 2021.02.19

# MVIETool

## Workflow:

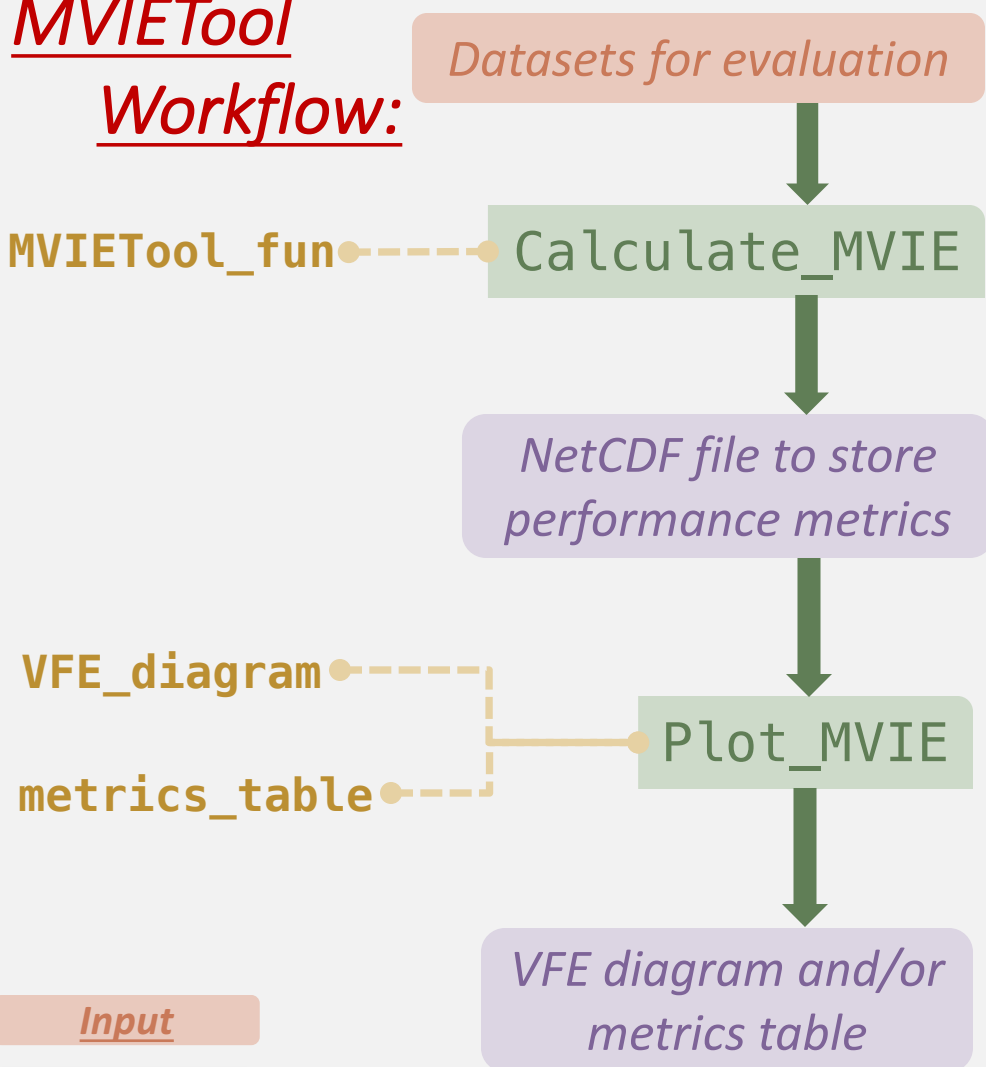

- Input
- Main script
- Fun script
- output

## What does user need to do?

Prepare datasets

Set arguments in `Calculate_MVIE`

Run `Calculate_MVIE`

Set arguments in `Plot_MVIE`

Run `Plot_MVIE`

How to preprate data?  
1.

How to set arguments for plotting?  
2.

✓ Discription of arguments in main scripts can be found in **readme.namelist**

Package is available at  
<https://github.com/Mengzhuo-Zhang/MVIETool>  
from the GitHub repository  
Any questions contact us:  
zhangmengzhuo1996@163.com

# 1. How to preprate data?

## Input Datasets in MVIETool:

- All evaluated variables of one model/observation/reanalysis dataset are stored in **the individual NetCDF file**.
- All NectCDF files are put **in the same directory**.
- Variables stored in the datafile need to be on the same grid.

## How to regrid data?

NCL •.....• Refer to: <http://www.ncl.ucar.edu/Applications/regrid.shtml>

Python3 •.....• With Xarray, refer to: <http://xarray.pydata.org/en/stable/interpolation.html>

CDO •.....• Refer to: <https://www.ch.cam.ac.uk/computing/software/climate-data-operators-cdo>  
e.g: To remap all fields bilinear to a new grid written in grid file use:  
`cdo remapbil,grid_file input_file output_file`  
To interpolate 3D variables on height levels to a new set of height levels use:  
`cdo intlevel,10,50,100,500,1000 input_file output_file`

All variables  
should be arrays  
with fixed format

Var\_Coords=False: Arrays with *the same dimension size* (shape)  
– the entire array are used for evaluation

Var\_Coords=True: Arrays with the *Dimension names* and *Coordinate variables*  
– can evaluate sub part of the array by setting relative arguments

| Var_Coords   | Dimension size (shape)                                                                                                                                  | Num of dimentions                                                                                                                                         | Coordinate variables                                                                                                                                                                                                             | Area weighting                                                                         |
|--------------|---------------------------------------------------------------------------------------------------------------------------------------------------------|-----------------------------------------------------------------------------------------------------------------------------------------------------------|----------------------------------------------------------------------------------------------------------------------------------------------------------------------------------------------------------------------------------|----------------------------------------------------------------------------------------|
| <b>False</b> | All variables' arrays need to be in the <b>same dimension size</b> (shape).                                                                             | No limit to the number of dimensions and no need for dimension names.                                                                                     | No need for coordinate variables.                                                                                                                                                                                                | Cannot add area weighting.                                                             |
| <b>True</b>  | All variables' arrays can have different dimension size (shape), but <b>selected part of arrays</b> should have the <b>same dimension size</b> (shape). | The number of dimensions is up to 4, and dimension names should be for latitude, longitude, time and level coordinates, which are same for all varibales. | Coordinate variable should be assigned to each dimension. Coordinate variables in different datafiles can be different, but their dimension names and their values in selected part of evaluated variable arrays should be same. | Can add area weighting when evaluated variable with latitude dimension and coordinate. |

**Note** Please install *numpy*, *xarray*, *Nio* and *Ngl* under Python-version.

**Ref**

**Dimension:** <http://www.ncl.ucar.edu/Document/Language/named.shtml>

**Coordinate variable:** <http://www.ncl.ucar.edu/Document/Language/cv.shtml>

How to define coordinate variables ?

| Coordinate | Content                                                                                                                                                                                                                                                                                                                                                                            | Coordinate variable creation in datasets                                                                                                                                                                                                                                                                                                                                                                                                     |                                                                                                                                                                                                                                                                                                                                 |
|------------|------------------------------------------------------------------------------------------------------------------------------------------------------------------------------------------------------------------------------------------------------------------------------------------------------------------------------------------------------------------------------------|----------------------------------------------------------------------------------------------------------------------------------------------------------------------------------------------------------------------------------------------------------------------------------------------------------------------------------------------------------------------------------------------------------------------------------------------|---------------------------------------------------------------------------------------------------------------------------------------------------------------------------------------------------------------------------------------------------------------------------------------------------------------------------------|
| Geo        | Latitude and/or longitude coordinate variables assigned to evaluated variable. MVIETool can read sub part of evaluated variable by <b>Range_geo</b> .                                                                                                                                                                                                                              | <b>1-D arrays of latitude and longitude which are monotonic</b>                                                                                                                                                                                                                                                                                                                                                                              |                                                                                                                                                                                                                                                                                                                                 |
|            |                                                                                                                                                                                                                                                                                                                                                                                    | <i>e.g.:</i><br>latitude = fspan(-90.,90., 181)<br>longitude = fspan(0.,359., 360)<br><b>NCL</b>                                                                                                                                                                                                                                                                                                                                             | <i>e.g.:</i><br><b>Python3</b><br>import numpy as np<br>lat = np.linspace(-90.,90., 181)<br>lon = np.linspace(0.,359., 360)                                                                                                                                                                                                     |
| Time       | Time coordinate variable assigned to evaluated variable. MVIETool can read sub part of evaluated variable by <b>Range_time</b> .                                                                                                                                                                                                                                                   | <b>[1] 1-D array with the mixed Julian/Gregorian date with a 'calendar' attribution using cd_inv_calendar</b><br><i>e.g.:</i><br>Ntime = 12<br>YYYY = new(Ntime,integer)<br>YYYY = 2000<br>MM = ispan(1, 12, 1)<br>A_0 = new(12,integer)<br>A_0 = 0<br>time = cd_inv_calendar(YYYY,MM,A_0,A_0,A_0\ ,A_0,"hours since 1900-01-01 00:00:00",0)<br><b>[2] 1-D array of numeric values with time step</b><br><i>e.g.:</i> time = ispan(1, 12, 1) | <b>[1] Time series with DateTimeIndex</b><br><i>e.g.:</i><br>import pandas as pd<br>Ntime= 12<br>time = pd.Series(np.linspace(1,\ Ntime,Ntime),index=pd.date_range(\ "2000-01-01",periods=Ntime,\ freq="M"))<br><b>[2] Time series</b><br><i>e.g.:</i><br>import pandas as pd<br>Ntime= 12<br>time = np.linspace(1,Ntime,Ntime) |
| Level      | Level coordinate variable assigned to evaluated variable. MVIETool can read specific level of evaluated variable as an individual variable by <b>VarLev</b> . If some of evaluated variables with level coordinate and the others without, the level value in <b>VarLev</b> for variables without level dimension can set to be arbitrary value that would be omitted by the tool. | <b>1-D array of levels</b>                                                                                                                                                                                                                                                                                                                                                                                                                   |                                                                                                                                                                                                                                                                                                                                 |

## How to save variables with dimension name and coordinate variables?

Assume that a variable named 'psl' has been preprocessed into [Nlat]X[Nlon]X[Ntime] array and waits to be saved with dimension names (i.e., "lat", "lon", "time") and coordinate variables (i.e., latitude, longitude, time). Coordinate variables have been defined in examples of "How to define coordinate variables?". Example code is given as follows:

### NCL filedimdef, filevardef, filevarattdef

```
f = addfile(filename, "c")
;Define dimension names
filedimdef(f, (/ "time", "lat", "lon" /), (/ Nlat, Nlon, Ntime /), (/ False, False, False /))
;Save coordinate variables
filevardef(f, "lat", Typ_lat, "lat")
f->lat = (/ latitude /)
filevardef(f, "lon", Typ_lon, "lon")
f->lon = (/ longitude /)
filevardef(f, "time", Typ_time, "time")
Att = True ;when setting time using Type-[1], its units must be set
Att@units = "hours since 1900-01-000:00:00"
filevarattdef(f_new, "time", Att)
f->time = (/ time /)
;Save model/obs data
filevardef(f, "psl", Typ_var, (/ "time", "lat", "lon" /))
f->psl = (/ psl /)
```

#### NCL version=====

Var\_Coords = True

isCoords\_geo = True  
Coords\_geo = (/ "lat", "lon" /)  
Range\_geo = (/ "lat|0:90", "lon|0:360" /)  
Isarea\_wgt = "lat"

isCoords\_time = True  
Coords\_time = "time"  
Range\_time = (/ 1, 10 /)  
Range\_time = (/ "200001", "200010" /)

array of two strs in the format: "YYYYMM", "YYYYMMDD", or "YYYYMMDDHH", where YYYY is the year, MM is the month, DD is the day, and HH is the hour  
time coordinate variable in input datafiles must with 'clendar' attribution

Arguments  
in MVIETool  
for example:

### Python3 file.create\_dimension, file.variables

```
import Nio
f = Nio.open_file(filename, "c")
#Define dimension names
f_new.create_dimension('lat', Nlat)
f_new.create_dimension('lon', Nlon)
f_new.create_dimension('time', Ntime)
#Save coordinate variables
f_new.create_variable('lat', 'f', ('lat',))
f_new.variables['lat'].assign_value(np.float32(lat))
f_new.create_variable('lon', 'f', ('lon',))
f_new.variables['lon'].assign_value(np.float32(lon))
f_new.create_variable('time', 'd', ('time',))
f_new.variables['time'].assign_value(time)
#Save model/obs data
f_new.create_variable('psl', 'f', ("time", "lat", "lon"))
f_new.variables['psl'][:] = np.float32(psl)
```

#### Python3 version =====

Var\_Coords = True

isCoords\_geo = True  
Coords\_geo = ["lat", "lon"]  
Range\_geo = {"lat": [0, 90], "lon": [0, 360]}  
Isarea\_wgt = "lat"

isCoords\_time = True  
Coords\_time = "time"  
Range\_time = [1, 10]  
Range\_time = ["2000-01-01", "2000-10-01"]

List/tuple of two int/float values in time coordinate variable

List/tuple of two DateTimeIndex (str), and time coordinate variable in input datasets must be defined with DateTimeIndex

## 2. How to set arguments for plotting?

### VFE diagram

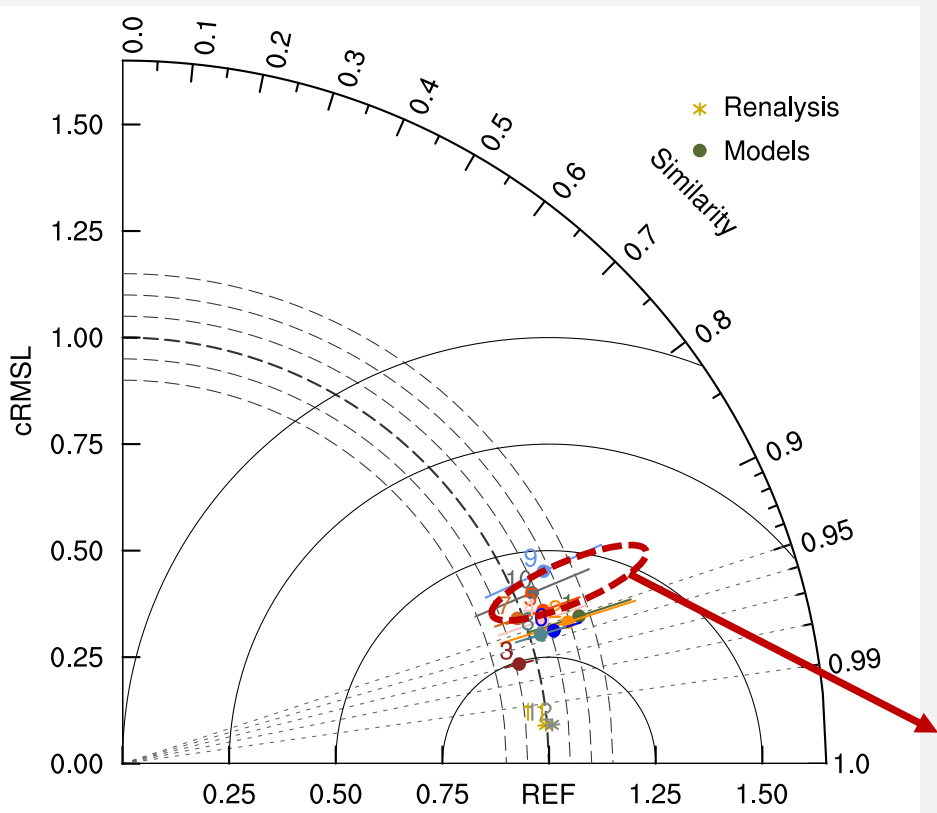

*VFE diagram provides a concise evaluation of how vector field matches to another in terms of RMSL, VSC, RMSVD.*

- Azimuthal position ---> **VSC**
- Radial distance from the origin ---> **RMSL**
- Distance between the point and point (1,0) ---> **RMSVD**

RMSL and VSC are needed to create VFE diagram.  
VFE diagram can be used for individual scalar variables, individual vector variables, or multivariable fields by setting statistic-name in **Stats\_metrics1**.

e.g.:

```
Stats_metrics1 = ("/cRMSL", "cVSC/")
plot_std_l     = "SD_std"

Stats_metrics1 = ["cRMSL", "cVSC"]
plot_std_l     = "SD_std"
```

|                                                     | Stats_metrics1 | NOTE                                                                                                 |
|-----------------------------------------------------|----------------|------------------------------------------------------------------------------------------------------|
| Individual scalar variable                          | SD, CORR       | Need to assign which variable to plot with <b>ivar</b> and if not, plot statistics of first variable |
|                                                     | rms, uCORR     |                                                                                                      |
| Individual vector variable<br>/ Multivariable field | cRMSL, cVSC    | Can add lines for each of points, which can represent SD_std/rms_std, with <b>plot_std_l</b>         |
|                                                     | RMSL, VSC      |                                                                                                      |

VFE diagram: opt\_VFE

xyFontHeightF  
font height for tickmark labels

stnArc  
plot specified standard arc

tiYAxisString  
title string for y-axis

OneX  
string marked at (1,0)

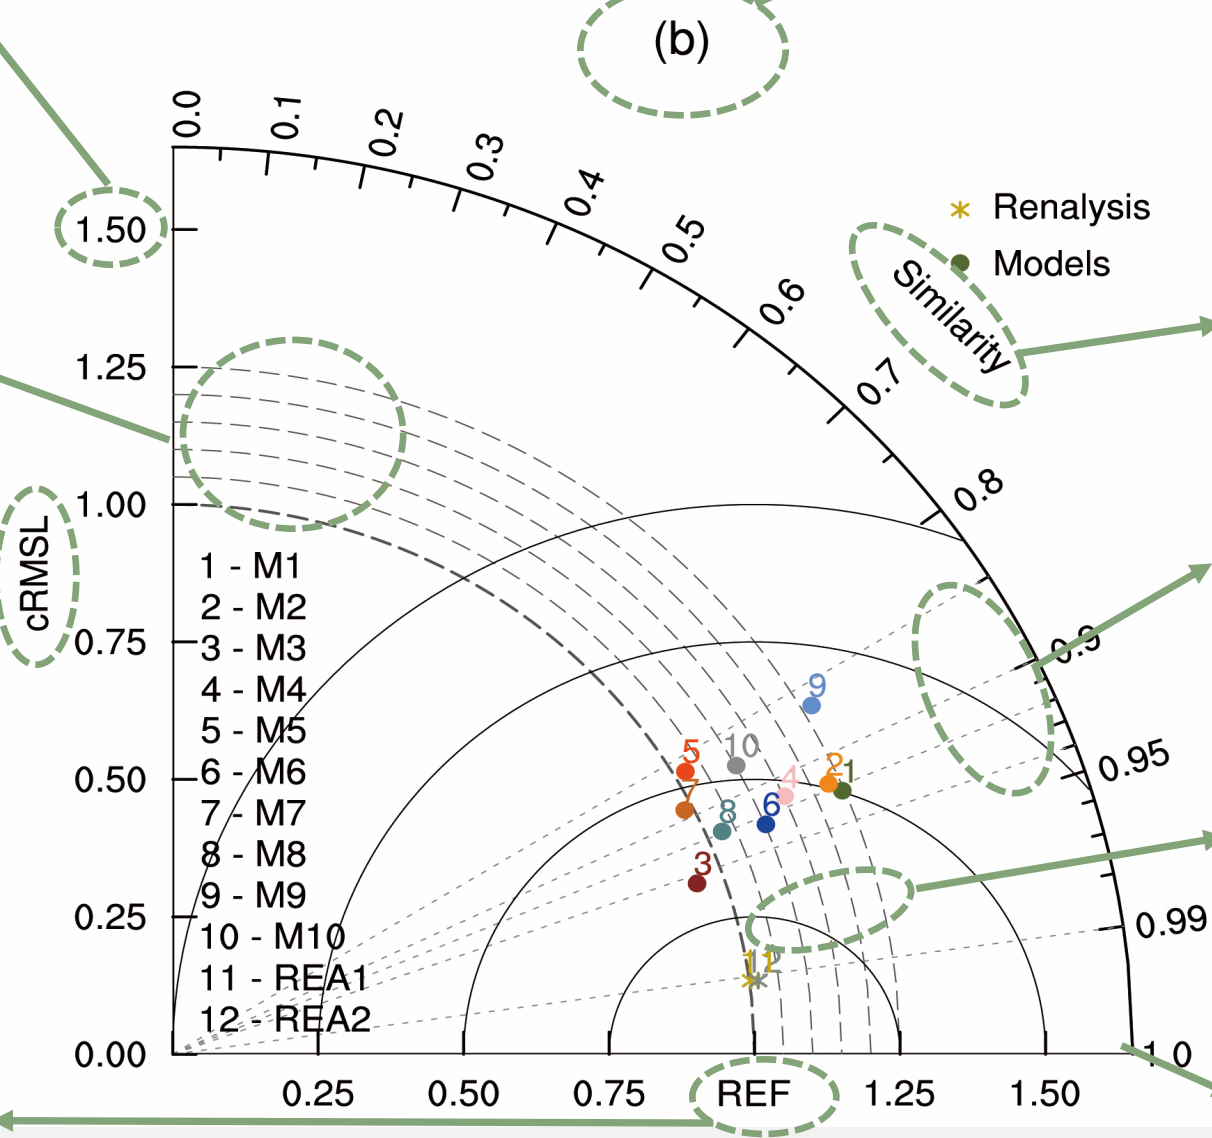

tiMainString  
tiMainFontHeightF  
diagram title string and its font height

CorLabel  
title string for arc-axis

ccRays  
plot specified radial lines

cirArc  
plot specified circumferential arc

xyMax  
max value of X-axis and Y-axis



## VFE diagram: opt\_VFE

Ref

Marker Index

<http://www.ncl.ucar.edu/Document/Graphics/Images/markers.png>

Named colors

[http://www.ncl.ucar.edu/Document/Graphics/named\\_colors.shtml](http://www.ncl.ucar.edu/Document/Graphics/named_colors.shtml)  
<http://www.pyngl.ucar.edu/Graphics/rgb.txt>

NhITColorIndex

<http://www.ncl.ucar.edu/Document/HLUs/Classes/Workstation.shtml#NhITColorIndex>

MarkersOn

Valid when set 'True'

whether to plot markers for models and/or obs

if False, only use count numbers to represent models and/or obs

Markers marker types for models or/and obs points

All models (obs) points use the same Marker Index.

gsMarkerThicknessF thickness for markers

gsMarkerSizeF size for markers

Colors colors for model or/and obs points

Three ways to set N colors:

- I. 1-D string array / list(tuple) consisting of str using named color
- II. 1-D int array / list(tuple) consisting of int using NhITColorIndex
- III. N x 3 (N x 4) RGB (RGBA) array / N-len list(tuple) consisting of 3(4)-len list(tuple) representing RGB (RGBA)

Colors are assigned to points of cases (model+obs) in order. If num of colors is less than num of cases, the tool uses one color to represent all models (obs) points.

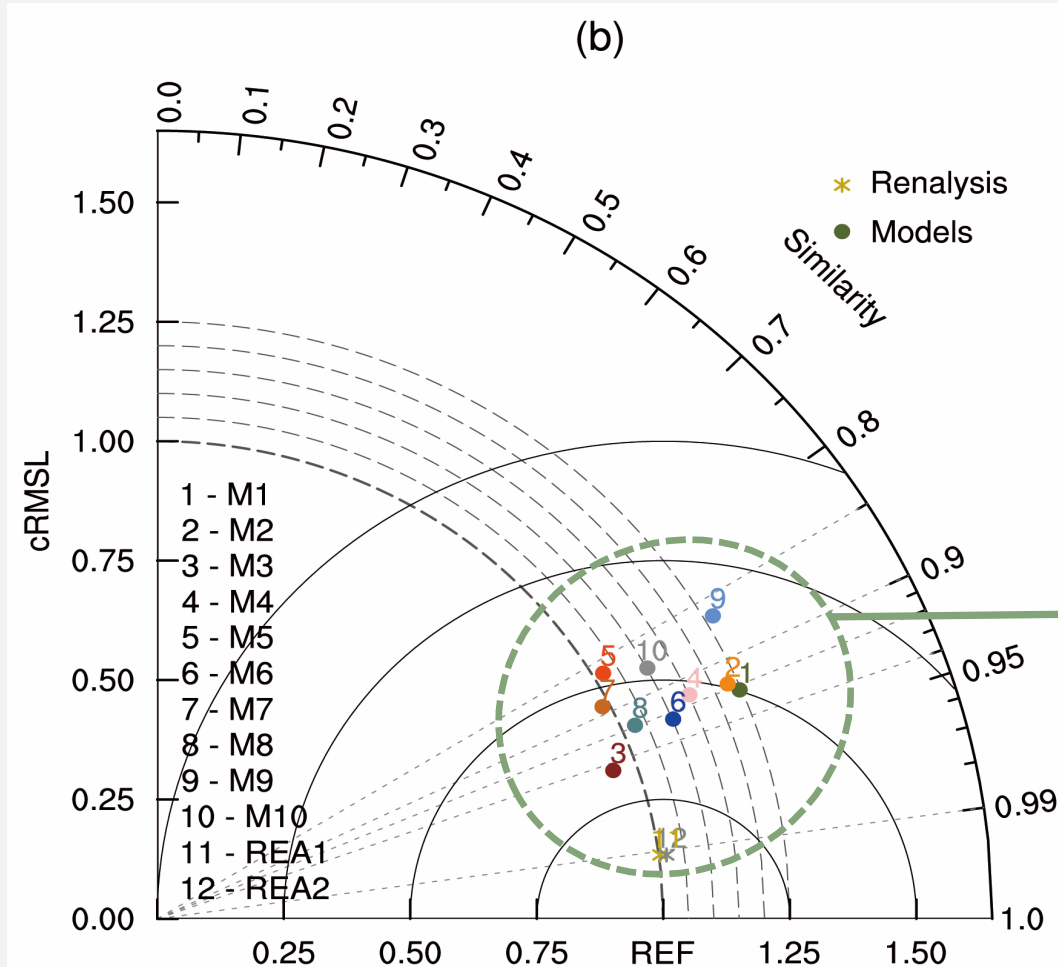

CountTxOn whether to add count-text for model/obs points

e.g., 1–12 in left diagram

when MarkersOn=False, tool will make CountTxOn=True

Valid  
when  
set  
'True'

CountFontHeight font height for count of points

CountTxXOffset / CountTxYOffset

distance between point and count number in X/Y-axis

when MarkersOn=False, tool will set to 0

VFE diagram: opt\_VFE

plot\_DatatypeLegendon whether to plot legend for markers

plot\_caselabels

whether to plot case labels

If set to **True**, list all the names of cases with their count number in the diagram.

Valid when  
set 'True'

caseLabelsXLoc  
caseLabelsYLoc

X (Y) start location of case labels

caseLabelsYinterval

Y-interval between two cases in  
caselabels

caseLabelsFontHeightF

font height for caselabels

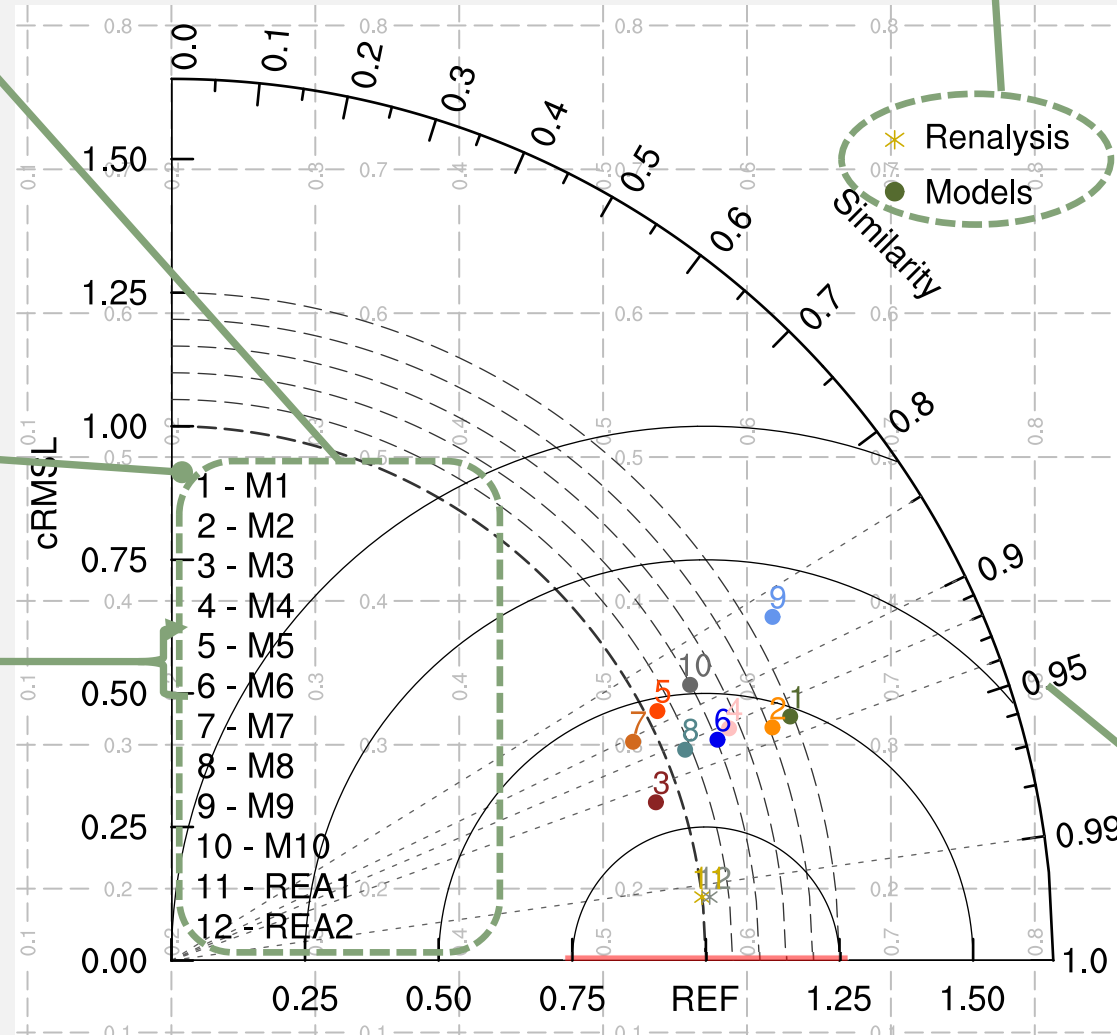

DatatypeLegend

content of legend for data sets

e.g. (/"Models","Renalysis"/) /  
["Models","Renalysis"]

DatatypeLegendWidth /  
DatatypeLegendHeight

Width / Height of data type legend

DatatypeLegendXL /  
DatatypeLegendYL

X / Y strat location for legend

draw\_grid

whether to draw grid on workstation  
in order to get location

## VFE diagram: opt\_VFE

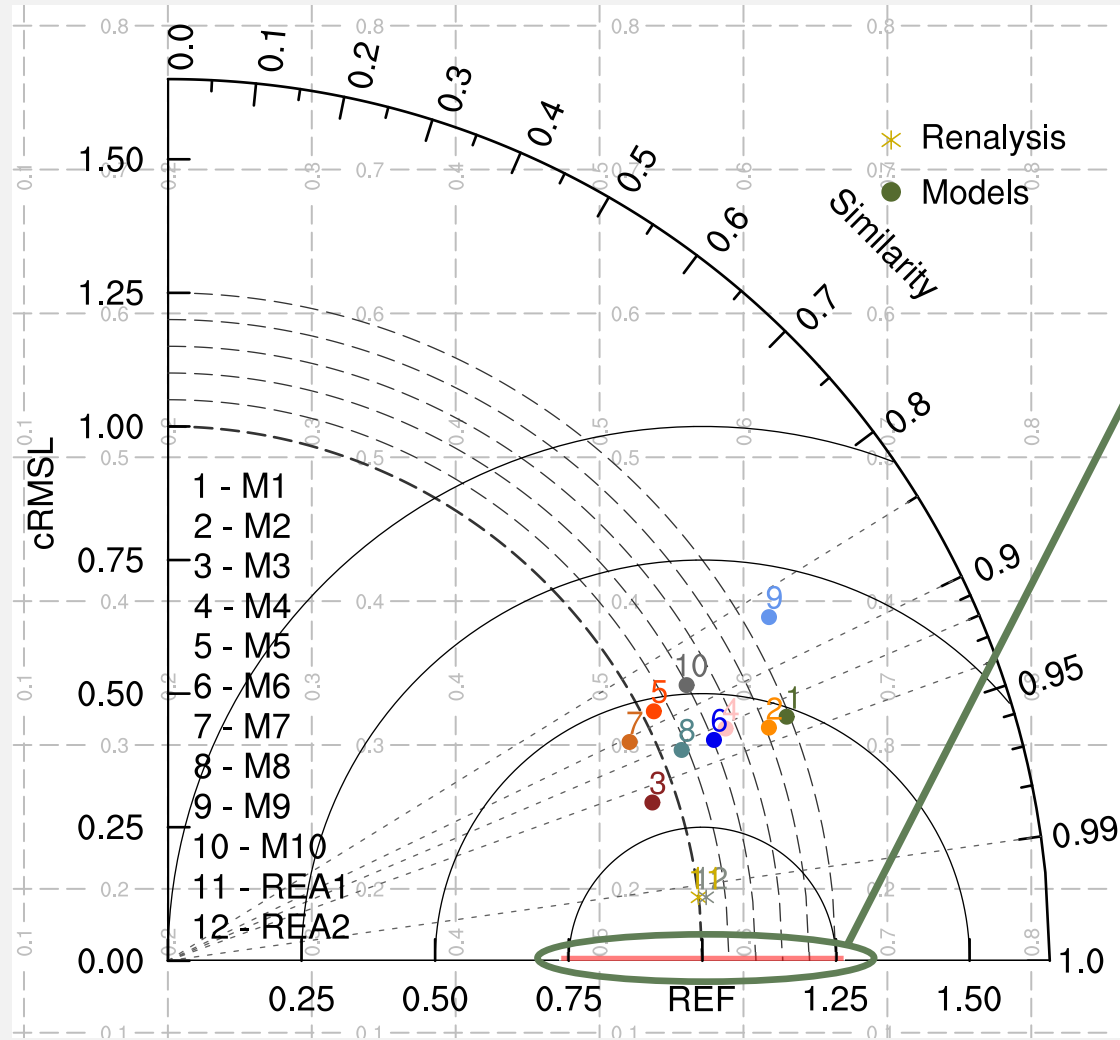

### obsUncer

a value measuring observational uncertainty when there is not only one observations and/or reanalysis in VFE diagram

If this argument is set, MVIETool use this value as the length to plot a red horizontal bar centered at (1,0) on X-axis in VFE diagram, which can represent observational uncertainty.

In the example (Sec 5.2) of paper 'An improved multivariable integrated evaluation method and NCL code for multimodel intercomparison (MVIETool version 1.0)' (Zhang et al., 2021), **the area-weighted mean of standard deviations ( $M_{SD}$ )** derived from multiple observations is used as the estimation of the observational uncertainty **in the evaluation of climatological mean spatial field**.

The data file and scripts for generating  $M_{SD}$  in the example is available at <https://github.com/Mengzhuo-Zhang/MVIETool> from the GitHub repository.

## 2. How to set arguments for plotting?

### Metrics table

*metrics table* is the table to show various statistics of model evaluation for numerous models. The color filled in each grid cell represents the value of statistics.

**level** and **colormap** is to help select filling colors for statistics. **level** is a monotonic 1-D array of numerics values and **colormap** should match with **level**, indicating number of colors must be greater than len of **level** plus 1. If **level** uses default, **colormap** would use default automatically whether **colormap** set or not.

Due to the ranges vary from one statistics to another and different standards of better performance in statistics, statistics are divided into **4 groups**, having individual **level** and **colormap**.

| Statistic Names                             | Range of Statistcs | Standard of better performance | Arguments             |
|---------------------------------------------|--------------------|--------------------------------|-----------------------|
| ME, VME, MEVM, MEVD                         | numeric values     | closer to 0                    | MElevels, MEcmap      |
| RMSD, RMSVD, rms_std, cRMSD, cRMSVD, SD_std | positive values    | closer to 0                    | RMSDlevels, RMSDcmap  |
| rms, RMSL, SD, cRMSL                        | positive values    | closer to 1                    | RMSlevels, RMScmap    |
| uCORR, VSC, CORR, cVSC, uMISS, cMISS        | 0-1                | closer to 1                    | CORRlevels, COR Rcmap |

## Metrics table

|                 | NCL version                                                                                                                                                                                                                                                                                                                                                                                                                                                                                                                                                                                                                                                                                                                                                                                                                                                                                                                                                                                                                                                                | Python version                                                                                                                                                                                                                                                                                                                                                                                                                                                                                     |
|-----------------|----------------------------------------------------------------------------------------------------------------------------------------------------------------------------------------------------------------------------------------------------------------------------------------------------------------------------------------------------------------------------------------------------------------------------------------------------------------------------------------------------------------------------------------------------------------------------------------------------------------------------------------------------------------------------------------------------------------------------------------------------------------------------------------------------------------------------------------------------------------------------------------------------------------------------------------------------------------------------------------------------------------------------------------------------------------------------|----------------------------------------------------------------------------------------------------------------------------------------------------------------------------------------------------------------------------------------------------------------------------------------------------------------------------------------------------------------------------------------------------------------------------------------------------------------------------------------------------|
| <b>level</b>    | level should be set to 1-D monotonic array of numeric values, e.g.:<br>(/0.1,0.2,0.3,0.4,0.5/)                                                                                                                                                                                                                                                                                                                                                                                                                                                                                                                                                                                                                                                                                                                                                                                                                                                                                                                                                                             | level should be set to list or tuple consisting of int/float and monotonic with increasing index, e.g.:<br>[0.1,0.2,0.3,0.4,0.5]                                                                                                                                                                                                                                                                                                                                                                   |
| <b>colormap</b> | <p><b>[1]</b> Set to a string using colorfile names, and tool will get colors from this colorfile equalspacedly according to the level. e.g.:<br/>"cmocean_curl"</p> <p><b>[2]</b> Set to 1-D array of NhITColorIndex. e.g.: (/1,2,3,4,5/)</p> <p><b>[3]</b> Set to 1-D array of named-color strings. e.g.:<br/>(/"red","blue","green"/)</p> <p><b>[4]</b> Set to N x 3 (N x 4) RGB (RGBA) array of numeric values, where N is the number of colors. e.g.: ((/0.5,0.5,0.4/), (/0.2,0.4,0.8/), (/0.9,0.1,0.2/)/)</p> <p><b>[5]</b> Set to 1-D array of named-color string and number-string for transition between two colors, which has format as (/color<sub>1</sub>', 'N<sub>1</sub>', 'color<sub>2</sub>', 'N<sub>2</sub>', ... 'color<sub>K-1</sub>', 'N<sub>K-1</sub>', 'color<sub>K</sub>'/), where N<sub>K-1</sub> is the number of transition colors between color<sub>K-2</sub> to color<sub>K-1</sub>, and it provides (N<sub>1</sub>+N<sub>2</sub>+...+N<sub>K-1</sub>)-(K-2) colors in all.<br/>e.g.: (/ "white", "3", "red", "5", "blue", "3", "green" /)</p> | <p><b>[1]</b> Set to list/tuple consisting of named-color strings, e.g.: ["red","blue","green"]</p> <p><b>[2]</b> Set to list/tuple consisting of NhITColorIndex (int), e.g.: [1,2,3,4,5]</p> <p><b>[3]</b> Set to string using colormap name, and the tool will get colors from setted color table equalspacedly according to the level, e.g.: "cmocean_curl"</p> <p><b>[4]</b> Set to list or tuple consisting of RGB/RGBA-list/tuple, e.g.:<br/>[[0.5,0.5,0.5],[0.1,0.1,0.1],[0.4,0.5,0.3]]</p> |

**Names colors** [http://www.ncl.ucar.edu/Document/Graphics/named\\_colors.shtml](http://www.ncl.ucar.edu/Document/Graphics/named_colors.shtml)

<http://www.pyngl.ucar.edu/Graphics/rgb.txt>

**Color-file name** [http://www.ncl.ucar.edu/Document/Graphics/color\\_table\\_gallery.shtml](http://www.ncl.ucar.edu/Document/Graphics/color_table_gallery.shtml)

[http://www.pyngl.ucar.edu/Graphics/color\\_table\\_gallery.shtml](http://www.pyngl.ucar.edu/Graphics/color_table_gallery.shtml)

**NhITColorIndex** <http://www.ncl.ucar.edu/Document/HLUs/Classes/Workstation.shtml#NhITColorIndex>

Ref

## An example for level and colormap

| METRICS |       | M1     | M2    | M3     | M4     | M5     | M6     | M7     | M8    | M9    | M10    | REA1   | REA2   |
|---------|-------|--------|-------|--------|--------|--------|--------|--------|-------|-------|--------|--------|--------|
| ME      | SLP   | 0.106  | 0.068 | 0.025  | 0.041  | 0.395  | 0.711  | -0.397 | 0.014 | 0.364 | -0.059 | 0.004  | -0.004 |
|         | Q600  | 0.034  | 0.043 | 0.008  | -0.010 | -0.094 | 0.013  | 0.074  | 0.093 | 0.059 | -0.011 | -0.002 | 0.002  |
|         | SST   | 0.371  | 0.296 | -0.080 | 0.059  | 0.296  | 0.038  | -0.301 | 0.018 | 0.019 | 0.321  | -0.061 | 0.061  |
|         | T850  | -0.026 | 0.026 | -0.022 | -0.077 | -0.139 | -0.151 | -0.037 | 0.114 | 0.005 | -0.037 | 0.009  | -0.009 |
|         | uv850 | 0.072  | 0.046 | 0.038  | 0.025  | 0.067  | 0.010  | 0.011  | 0.011 | 0.011 | 0.011  | 0.011  | 0.011  |
|         | uv200 | 0.097  | 0.055 | 0.013  | 0.175  | 0.010  | 0.010  | 0.010  | 0.010 | 0.010 | 0.010  | 0.010  | 0.010  |
| VME     |       | 0.125  | 0.095 | 0.035  | 0.091  | 0.118  | 0.089  | 0.111  | 0.110 | 0.096 | 0.121  | 0.020  | 0.020  |
| cRMSD   | SLP   | 0.563  | 0.758 | 0.414  | 0.499  | 0.598  | 0.451  | 0.406  | 0.546 | 0.595 | 0.486  | 0.072  | 0.072  |
|         | Q600  | 0.137  | 0.114 | 0.126  | 0.147  | 0.215  | 0.134  | 0.151  | 0.136 | 0.163 | 0.216  | 0.063  | 0.063  |
|         | SST   | 0.468  | 0.445 | 0.258  | 0.316  | 0.410  | 0.387  | 0.297  | 0.352 | 0.395 | 0.626  | 0.100  | 0.100  |
|         | T850  | 0.097  | 0.103 | 0.092  | 0.135  | 0.126  | 0.123  | 0.132  | 0.102 | 0.152 | 0.146  | 0.037  | 0.037  |
|         | uv850 | 0.483  | 0.454 | 0.311  | 0.437  | 0.476  | 0.414  | 0.432  | 0.396 | 0.655 | 0.517  | 0.119  | 0.119  |
|         | uv200 | 0.274  | 0.256 | 0.256  | 0.317  | 0.328  | 0.310  | 0.342  | 0.303 | 0.452 | 0.400  | 0.086  | 0.086  |
| cRMSVD  |       | 0.352  | 0.331 | 0.242  | 0.326  | 0.360  | 0.310  | 0.342  | 0.303 | 0.452 | 0.400  | 0.086  | 0.086  |
| SD_std  |       | 0.129  | 0.167 | 0.029  | 0.106  | 0.092  | 0.069  | 0.056  | 0.065 | 0.152 | 0.156  | 0.017  | 0.017  |
| SD      | SLP   | 1.275  | 1.400 | 1.010  | 1.171  | 0.964  | 1.182  | 0.999  | 1.106 | 1.210 | 1.196  | 1.023  | 0.981  |
|         | Q600  | 1.048  | 1.030 | 0.970  | 1.024  | 1.136  | 0.977  | 0.979  | 0.963 | 0.907 | 0.944  | 0.975  | 1.028  |
|         | SST   | 1.292  | 1.276 | 0.982  | 0.960  | 1.223  | 1.126  | 0.870  | 1.139 | 1.019 | 1.352  | 1.017  | 0.993  |
|         | T850  | 0.998  | 0.946 | 0.989  | 1.072  | 1.035  | 1.052  | 1.010  | 0.970 | 0.890 | 0.901  | 1.012  | 0.990  |
|         | uv850 | 1.245  | 1.206 | 0.954  | 1.130  | 1.022  | 1.010  | 0.970  | 0.890 | 0.901 | 1.012  | 0.990  | 0.990  |
|         | uv200 | 1.005  | 0.977 | 0.920  | 0.856  | 0.977  | 1.010  | 0.970  | 0.890 | 0.901 | 1.012  | 0.990  | 0.990  |
| cRMSL   |       | 1.127  | 1.094 | 0.958  | 1.036  | 1.050  | 1.059  | 0.984  | 1.028 | 1.085 | 1.043  | 0.997  | 1.010  |
| CORR    | SLP   | 0.906  | 0.852 | 0.915  | 0.906  | 0.815  | 0.928  | 0.917  | 0.870 | 0.872 | 0.917  | 0.998  | 0.998  |
|         | Q600  | 0.992  | 0.994 | 0.992  | 0.990  | 0.988  | 0.991  | 0.989  | 0.991 | 0.990 | 0.977  | 0.998  | 0.998  |
|         | SST   | 0.948  | 0.952 | 0.966  | 0.949  | 0.952  | 0.941  | 0.959  | 0.954 | 0.924 | 0.901  | 0.995  | 0.995  |
|         | T850  | 0.995  | 0.996 | 0.996  | 0.994  | 0.993  | 0.994  | 0.991  | 0.995 | 0.994 | 0.994  | 0.999  | 0.999  |
|         | uv850 | 0.930  | 0.932 | 0.951  | 0.923  | 0.890  | 0.927  | 0.904  | 0.925 | 0.868 | 0.883  | 0.993  | 0.993  |
|         | uv200 | 0.963  | 0.967 | 0.968  | 0.953  | 0.945  | 0.945  | 0.945  | 0.945 | 0.945 | 0.945  | 0.999  | 0.999  |
| cVSC    |       | 0.952  | 0.954 | 0.970  | 0.949  | 0.940  | 0.940  | 0.940  | 0.940 | 0.940 | 0.940  | 0.999  | 0.999  |
| cMISS   |       | 0.960  | 0.960 | 0.980  | 0.963  | 0.957  | 0.968  | 0.959  | 0.969 | 0.934 | 0.943  | 0.997  | 0.998  |
| uMISS   |       | 0.979  | 0.982 | 0.991  | 0.983  | 0.978  | 0.984  | 0.978  | 0.985 | 0.967 | 0.972  | 0.999  | 0.999  |

To distinguish **levels** and **colormaps** for different types of statistics, **black thick lines** are plotted between statistics with different colormaps.

```
opt_metrics@MElevs = (/ -0.3, -0.25, -0.2, -0.15, -0.1, -0.075, -0.05, -0.025, -0.01, 0., 0.01, 0.025, 0.05, 0.075, \
0.1, 0.15, 0.2, 0.25, 0.3, 0.4, 0.5, 0.6, 0.7/)
```

```
opt_metrics@MEcmap = "MPL_BuPu"
```

```
opt_metrics@RMSDlevs = (/ 0.05, 0.1, 0.15, 0.2, 0.25, 0.3, 0.35, 0.4, 0.45, 0.5, 0.6, 0.7/)
```

```
opt_metrics@RMSDcmap = (/ "white", "lightgoldenrodyellow", "lightgoldenrod1", "gold1", "darkgoldenrod1", \
"lightsalmon", "salmon", "orange", "tomato", "lightseagreen", "lightslateblue", "lightskyblue", \
"lightslateblue"/)
```

```
opt_metrics@RMSlevs = (/ 0.85, 0.9, 0.95, 0.99, 0.995, 0.999, 1.0, 1.001, 1.005, 1.01, 1.05, 1.1, 1.15, 1.25, 1.3, 1.35/)
```

```
opt_metrics@RMScmap = (/ 2132898229, 2135069383, 2136645837, 2138619862, 2141904102, 2145121791, 2146499839, \
2147479797, 2147475680, 2147269546, 2147258994, 2147183178, 2146450475, 2144081950, 2141589268, \
2138573327, 2136932352/)
```

```
opt_metrics@CORRlevs = (/ 0.85, 0.9, 0.92, 0.94, 0.96, 0.98, 0.99, 0.995, 0.998/)
```

```
opt_metrics@CORRcmap = (/ (/ 0.493, 0.568, 0.266/), (/ 0.578, 0.613, 0.315/), (/ 0.659, 0.654, 0.368/), \
(/ 0.704, 0.663, 0.425/), (/ 0.750, 0.677, 0.487/), (/ 0.795, 0.696, 0.553/), (/ 0.840, 0.723, 0.623/), \
(/ 0.886, 0.759, 0.697/), (/ 0.931, 0.805, 0.775/), (/ 0.977, 0.865, 0.857/)/)
```

NCL

```
opt_metrics.MElevs = [-0.3, -0.25, -0.2, -0.15, -0.1, -0.075, -0.05, -0.025, -0.01, 0., 0.01, 0.025, 0.05, 0.075, \
0.1, 0.15, 0.2, 0.25, 0.3, 0.4, 0.5, 0.6, 0.7]
```

```
opt_metrics.MEcmap = "MPL_BuPu"
```

```
opt_metrics.RMSDlevs = [0.05, 0.1, 0.15, 0.2, 0.25, 0.3, 0.35, 0.4, 0.45, 0.5, 0.6, 0.7]
```

```
opt_metrics.RMSDcmap = ["white", "lightgoldenrodyellow", "lightgoldenrod1", "gold1", "darkgoldenrod1", \
"lightsalmon", "salmon", "orange", "tomato", "lightseagreen", "lightslateblue", "lightskyblue", \
"lightslateblue"]
```

```
opt_metrics.RMSlevs = [0.85, 0.9, 0.95, 0.99, 0.995, 0.999, 1.0, 1.001, 1.005, 1.01, 1.05, 1.1, 1.15, 1.25, 1.3, 1.35]
```

```
opt_metrics.RMScmap = [2132898229, 2135069383, 2136645837, 2138619862, 2141904102, 2145121791, 2146499839, \
2147479797, 2147475680, 2147269546, 2147258994, 2147183178, 2146450475, 2144081950, 2141589268, \
2138573327, 2136932352]
```

```
opt_metrics.CORRlevs = [0.85, 0.9, 0.92, 0.94, 0.96, 0.98, 0.99, 0.995, 0.998]
```

```
opt_metrics.CORRcmap = [[0.493, 0.568, 0.266], [0.578, 0.613, 0.315], [0.659, 0.654, 0.368], [0.704, 0.663, 0.425], \
[0.750, 0.677, 0.487], [0.795, 0.696, 0.553], [0.840, 0.723, 0.623], [0.886, 0.759, 0.697], \
[0.931, 0.805, 0.775], [0.977, 0.865, 0.857]]
```

Python3

➤ **Colormap default:** better model performance with lighter color



Metrics table: opt\_metrics

Design of metrics table: CaseLocation

CaseLocation = "Top"

caselabels on the top and statstic label in the left

when the number of **statistics** shown is relative larger than that of cases

Diagram illustrating the metrics table layout for CaseLocation = "Top". The table is labeled with dimensions: caseWidth, caseHeight, zoom, and varWidth. The table structure is as follows:

| METRICS |       | M1    | M2    | M3    | M4    | M5    | M6    | M7    | M8    | M9    | M10   | REA1  | REA2  |
|---------|-------|-------|-------|-------|-------|-------|-------|-------|-------|-------|-------|-------|-------|
| SD      | SLP   | 1.269 | 1.396 | 1.024 | 1.166 | 0.965 | 1.172 | 1.004 | 1.100 | 1.199 | 1.171 | 1.025 | 0.984 |
|         | SST   | 1.041 | 1.031 | 0.992 | 1.020 | 1.135 | 0.979 | 0.979 | 0.969 | 0.909 | 0.962 | 0.972 | 1.032 |
|         | Q600  | 1.278 | 1.270 | 0.972 | 0.951 | 1.223 | 1.120 | 0.868 | 1.134 | 1.016 | 1.332 | 1.014 | 0.997 |
|         | T850  | 0.997 | 0.946 | 0.982 | 1.081 | 1.034 | 1.049 | 1.011 | 0.971 | 0.891 | 0.907 | 1.011 | 0.991 |
|         | uv850 | 1.247 | 1.212 | 0.952 | 1.137 | 1.022 | 1.104 | 0.965 | 1.037 | 1.295 | 1.094 | 1.001 | 1.015 |
|         | uv200 | 1.000 | 0.976 | 0.916 | 0.851 | 0.977 | 1.009 | 1.047 | 1.051 | 0.985 | 0.984 | 0.986 | 1.016 |
| cRMSL   |       | 1.125 | 1.096 | 0.959 | 1.040 | 1.050 | 1.058 | 0.986 | 1.026 | 1.085 | 1.041 | 0.997 | 1.012 |

CaseLocation = "Left"

caselabels at the left and statstic label on the top

when the number of **cases** shown is relative larger than that of statistics

Diagram illustrating the metrics table layout for CaseLocation = "Left". The table is labeled with dimensions: titleWidth, titleHeight, caseHeight, and zoom. The table structure is as follows:

| METRICS | cRMSD |       |       |       |       |       | cRMSVD |
|---------|-------|-------|-------|-------|-------|-------|--------|
|         | SLP   | SST   | Q600  | T850  | uv850 | uv200 |        |
| M1      | 0.566 | 0.144 | 0.463 | 0.098 | 0.490 | 0.269 | 0.353  |
| M2      | 0.751 | 0.115 | 0.442 | 0.104 | 0.464 | 0.252 | 0.335  |
| M3      | 0.405 | 0.134 | 0.272 | 0.097 | 0.313 | 0.254 | 0.244  |
| M4      | 0.495 | 0.154 | 0.321 | 0.202 | 0.447 | 0.315 | 0.336  |
| M5      | 0.599 | 0.216 | 0.409 | 0.127 | 0.476 | 0.328 | 0.360  |
| M6      | 0.443 | 0.138 | 0.387 | 0.125 | 0.420 | 0.265 | 0.312  |
| M7      | 0.401 | 0.153 | 0.299 | 0.136 | 0.445 | 0.405 | 0.349  |
| M8      | 0.531 | 0.138 | 0.349 | 0.108 | 0.400 | 0.296 | 0.303  |
| M9      | 0.582 | 0.165 | 0.394 | 0.157 | 0.658 | 0.344 | 0.452  |
| M10     | 0.477 | 0.217 | 0.619 | 0.157 | 0.527 | 0.294 | 0.403  |
| REA1    | 0.097 | 0.069 | 0.105 | 0.043 | 0.127 | 0.048 | 0.091  |
| REA2    | 0.097 | 0.069 | 0.105 | 0.043 | 0.127 | 0.048 | 0.091  |

Metrics table: opt\_metrics

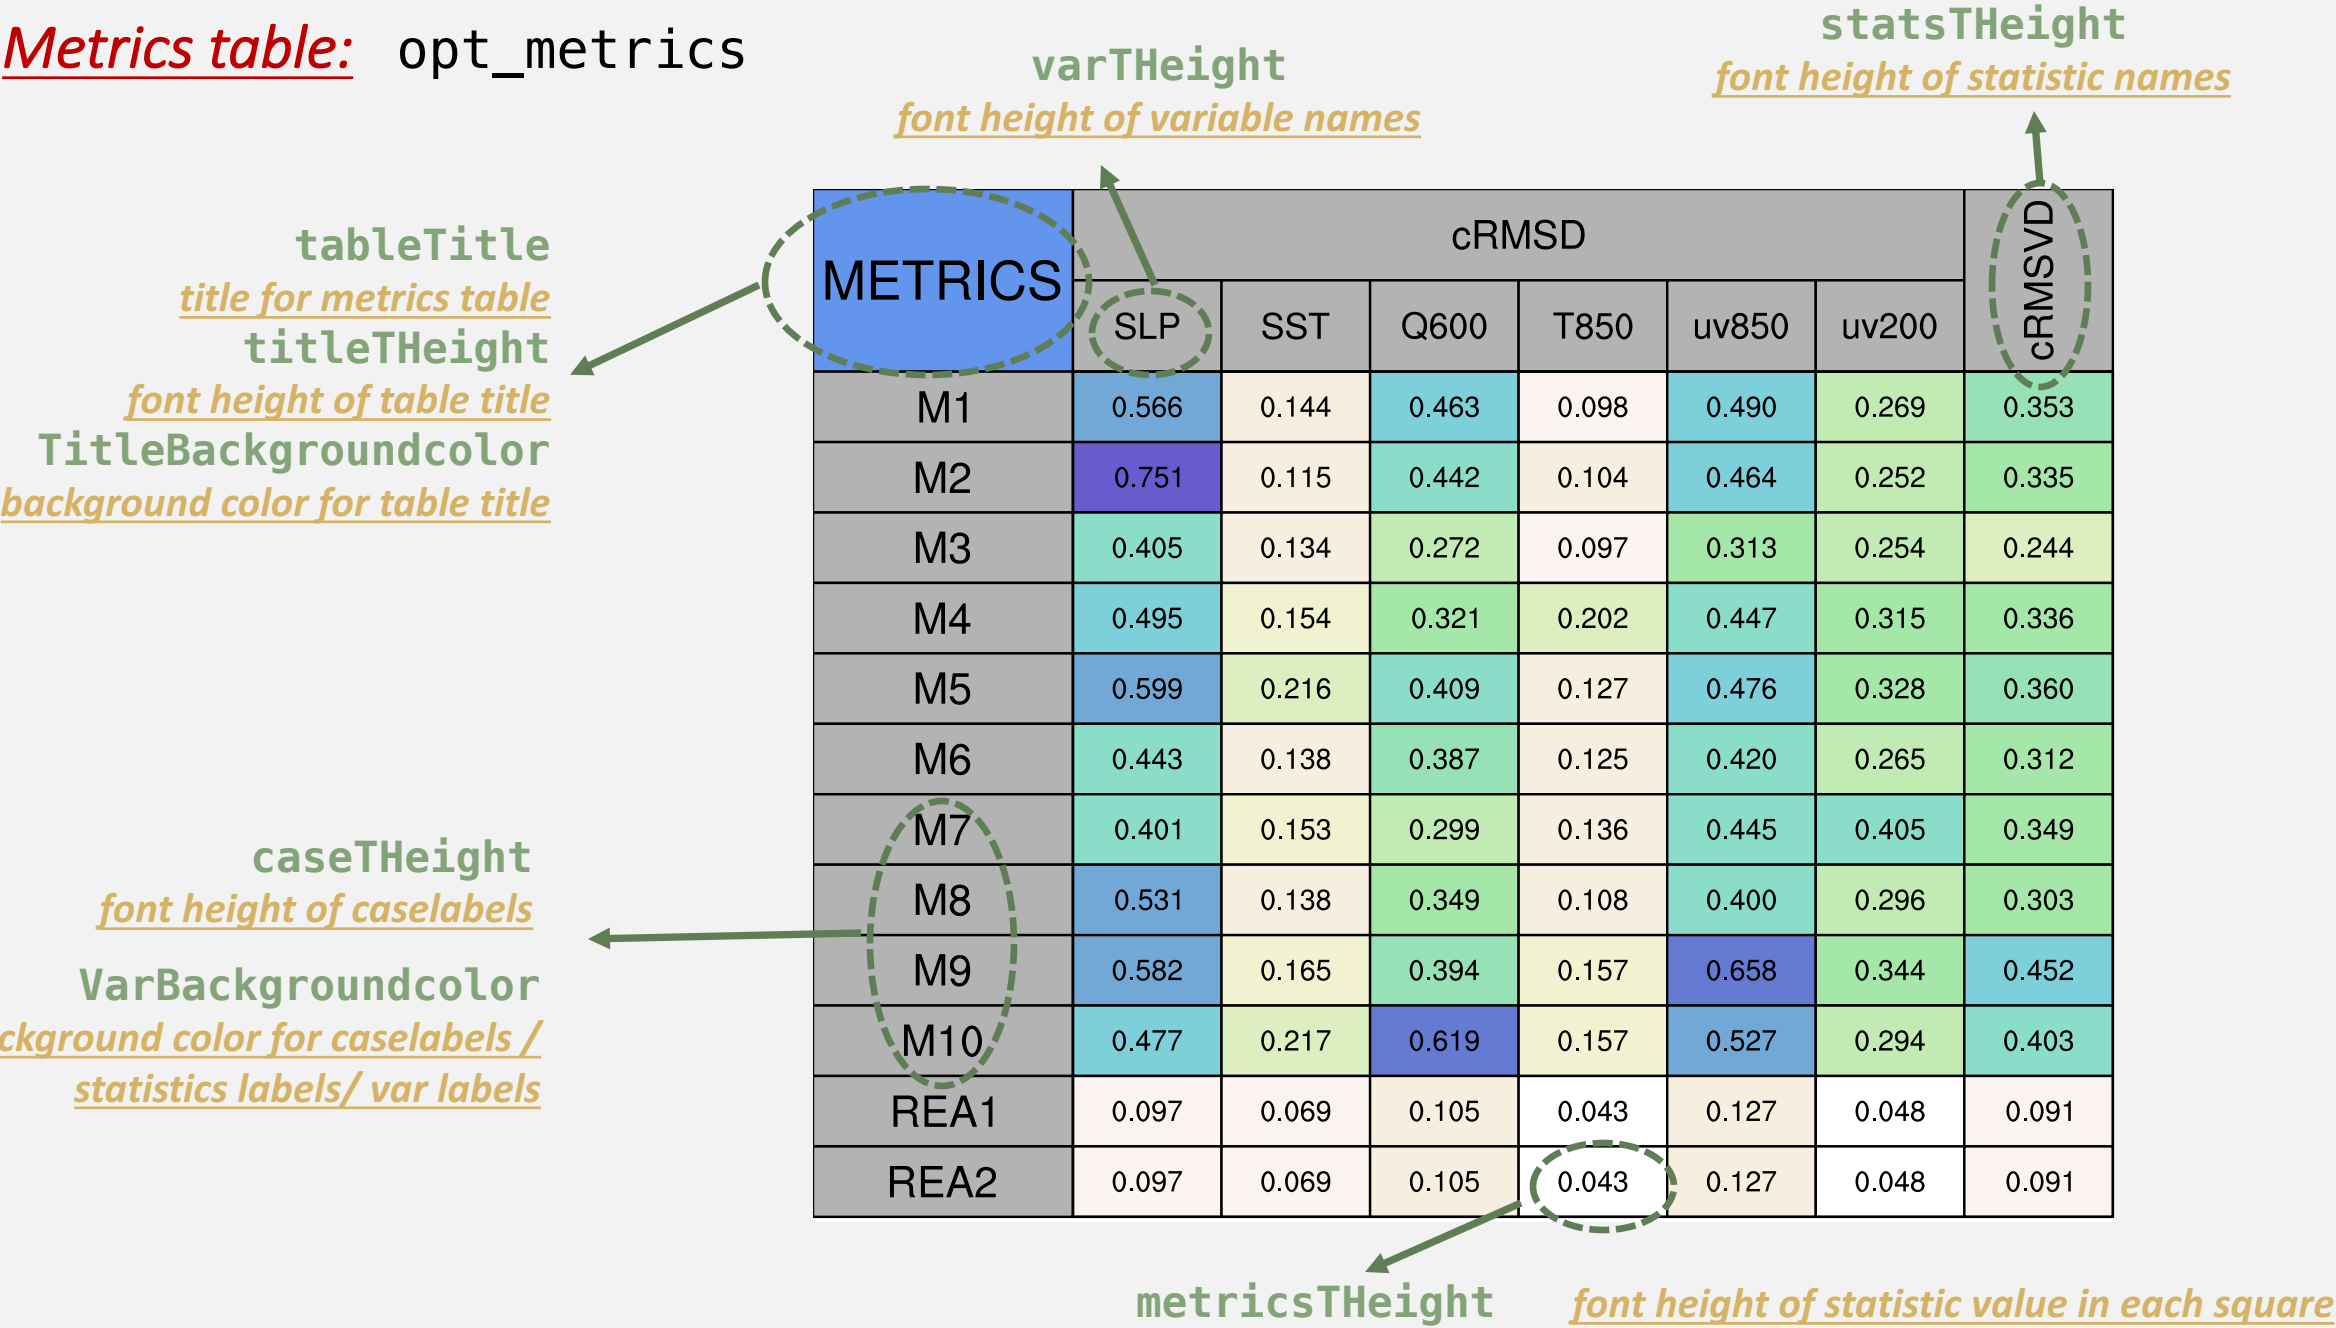



Users can decide which statistics are shown in the metric table by editing the `stats_metrics2`. It is an **1-D array** or **list/tuple** of string with statistics names. Specially, statistics for summary, i.e., cMISS, uMISS, can be enclosed with red thick box for emphasis, with `highlightsummary` for `opt_metrics`. e.g:

| METRICS | M1    | M2    | M3    | M4    | M5    | M6    | M7    | M8    | M9    | M10   | REA1  | REA2  |
|---------|-------|-------|-------|-------|-------|-------|-------|-------|-------|-------|-------|-------|
| cVSC    | 0.951 | 0.953 | 0.970 | 0.946 | 0.940 | 0.956 | 0.938 | 0.955 | 0.909 | 0.923 | 0.996 | 0.996 |
| cMISS   | 0.960 | 0.960 | 0.979 | 0.961 | 0.957 | 0.968 | 0.958 | 0.969 | 0.934 | 0.943 | 0.997 | 0.997 |
| uMISS   | 0.979 | 0.982 | 0.990 | 0.982 | 0.978 | 0.984 | 0.978 | 0.985 | 0.967 | 0.972 | 0.999 | 0.999 |

```
stats_metrics2 = ("/cVSC","cMISS","uMISS"/)
opt_metrics@showTextOn = True
opt_metrics@decialMetricsN = "4.3"
opt_metrics@highlightsummary = True
```

NCL

```
stats_metrics2 = ["cVSC","cMISS","uMISS"]
opt_metrics.showTextOn = True
opt_metrics.decialMetricsN = "4.3"
opt_metrics.highlightsummary = True
```

Python3

If there are too many cases and statistics needing to be shown in the table, statistic values can be omitted in table with `showTextOn`. In this case, each grid cell is only filled with color and then the colorbar will be drawn by the tool. Besides, the format of values marked in the colorbars also can be set with `decialBarN` of `opt_metrics`. `decialMetricsN/ decialBarN` is a string like “A.B”, where A(B) indicates showing number of digits (after the decimal point) for the value. `colorbarFHeight` of `opt_metrics` is used to set font height of colorbar markers.

If we choose to show statistics, the format of statistics shown can be set with `decialMetricsN` for `opt_metrics` as well.

When **ME** shown in the table, if the datafile has **MEVD**, **MEVD** of 2-D individual variables can be chosen to plot near its **ME** with `plotMEVD` of `opt_metrics`. **MEVD** dividing 180 is used to get filling color in MEcmap.

e.g:

NCL

```
opt_metrics@showTextOn = False
opt_metrics@decialBarN = "3.2 "
opt_metrics@plotMEVD = True
```

Python3

```
opt_metrics.showTextOn = False
opt_metrics.decialBarN = "3.2 "
opt_metrics.plotMEVD = True
```

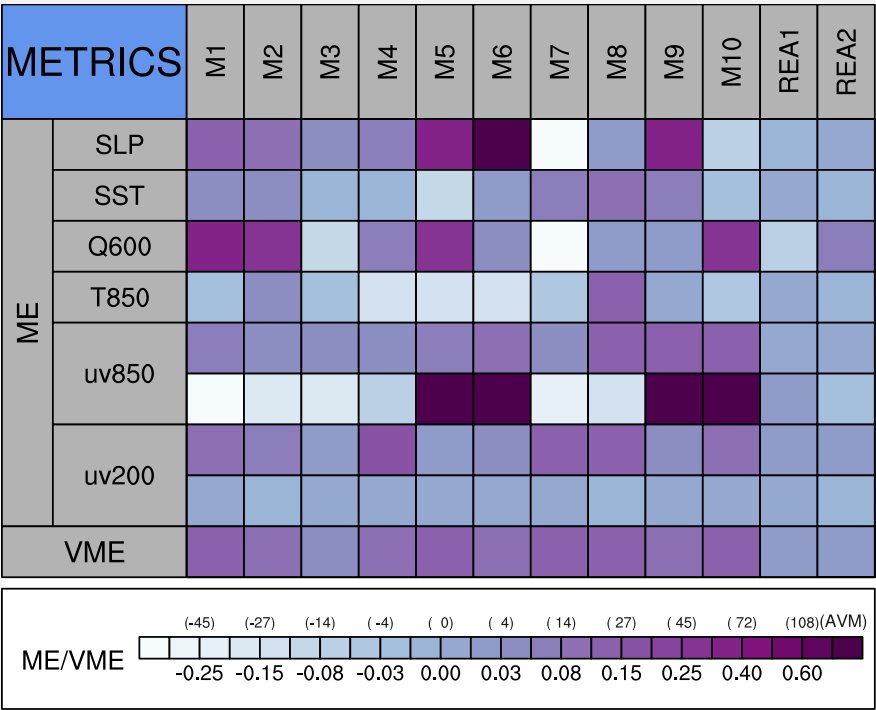

## Metrics table: opt\_metrics

Commonly, statistics from different evaluation objects, e.g., different seasons, different periods, can be shown in a table at the same time, by setting **MVIE\_filenames2** with some datafile names. Note that the number of datafiles is up to 4.

*each square divided into 4 triangles*

In this case, each grid cell of table is divided into some parts and only filled with colors without values. **stats\_metrics2** should be the common statistics of all datafiles.

Box legend is provided with **box\_legend** for **opt\_metrics** and it is set to **an array of strings / list or tuple consisting of str** that matches with the number of datafiles. Its default is not showing box legend. The height of box legend can be set with **box\_lgheight** of **opt\_metrics** (ratio of its height to width matches with grid cell in the table) and font height can be set with **box\_lgFontHeightF** of **opt\_metrics**.

Box legend

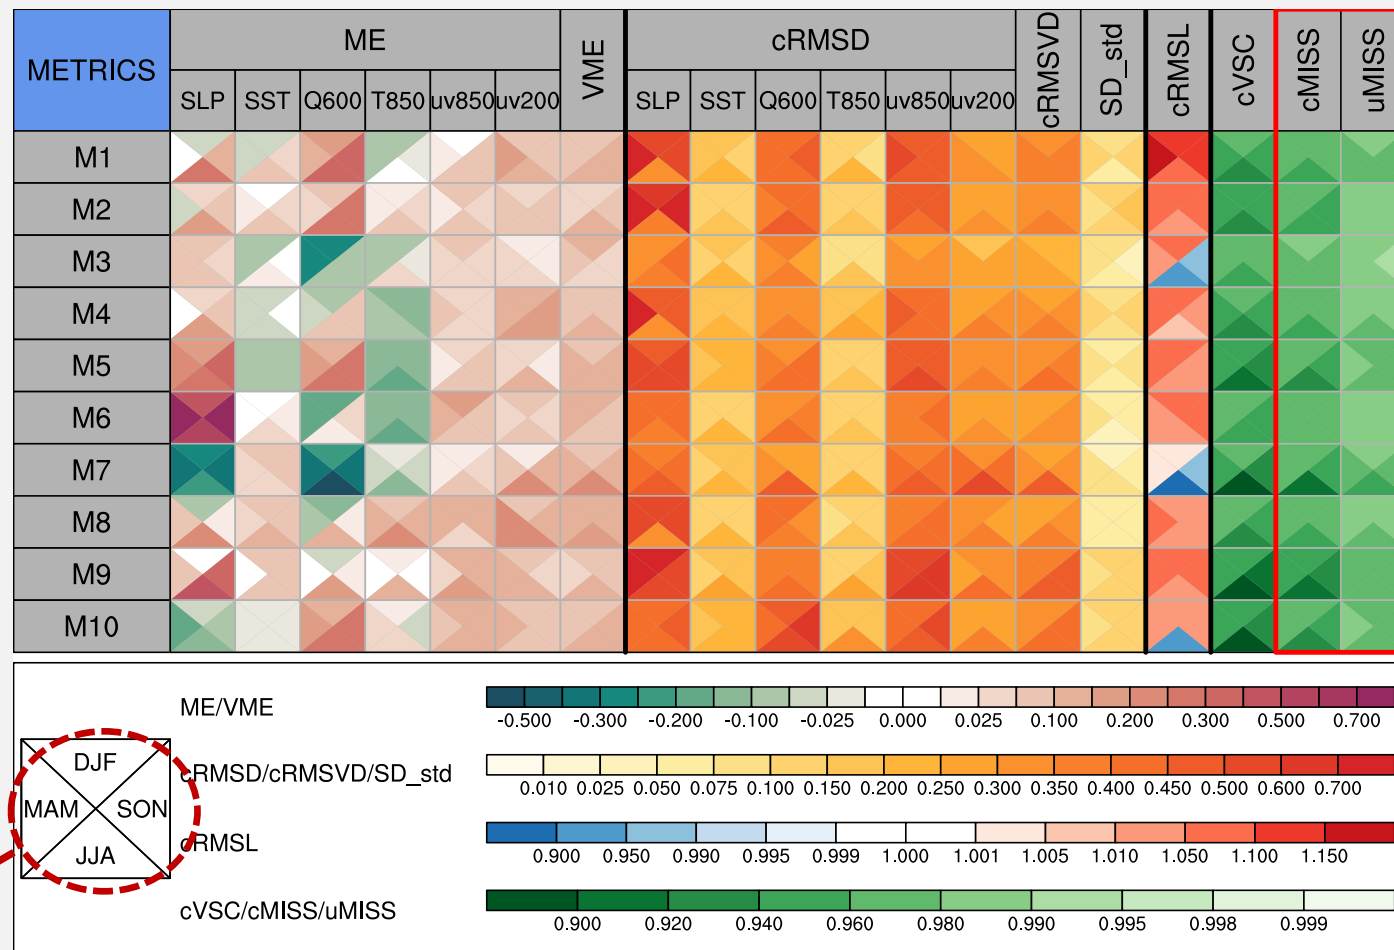

## Acronyms of statistics mentioned in User Guide and description

| Acronyms     | Description                                     | Acronyms       | Description                                 |
|--------------|-------------------------------------------------|----------------|---------------------------------------------|
| <i>SD</i>    | Standard deviation                              | <i>cRMSL</i>   | Centered root mean square length            |
| <i>CORR</i>  | Correlation coefficient                         | <i>cVSC</i>    | Centered vector similarity coefficient      |
| <i>cRMSD</i> | Centered root mean square difference            | <i>cRMSVD</i>  | Centered root mean square vector difference |
| <i>rms</i>   | Root mean square                                | <i>SD_std</i>  | Standard deviation of SD values             |
| <i>uCORR</i> | Uncentered correlation coefficient              | <i>RMSL</i>    | Root mean square length                     |
| <i>RMSD</i>  | Root mean square difference                     | <i>VSC</i>     | Vector similarity coefficient               |
| <i>ME</i>    | Mean error                                      | <i>RMSVD</i>   | Root mean square vector difference          |
| <i>cMISS</i> | Centered multivariable integrated skill score   | <i>rms_std</i> | Standard deviation of rms values            |
|              |                                                 | <i>VME</i>     | Vector mean error                           |
| <i>uMISS</i> | Uncentered multivariable integrated skill score | <i>MEVM</i>    | Mean error of vector magnitude              |
|              |                                                 | <i>MEVD</i>    | Mean error of vector direction              |

**NOTE:** Input statistics should be an array with dimension size (shape) as **[Ncase] x [Nvar]**,

Input statistics should be an array with dimension size (shape) as **[Ncase]**
