# Supplementary figures and images for: An improved multivariable integrated evaluation method and tool (MVIETool) v1.0 for multimodel intercomparison
Source: Copernicus journal article supplement (doi:10.5194/gmd-14-3079-2021), 2021-05-28

(a)

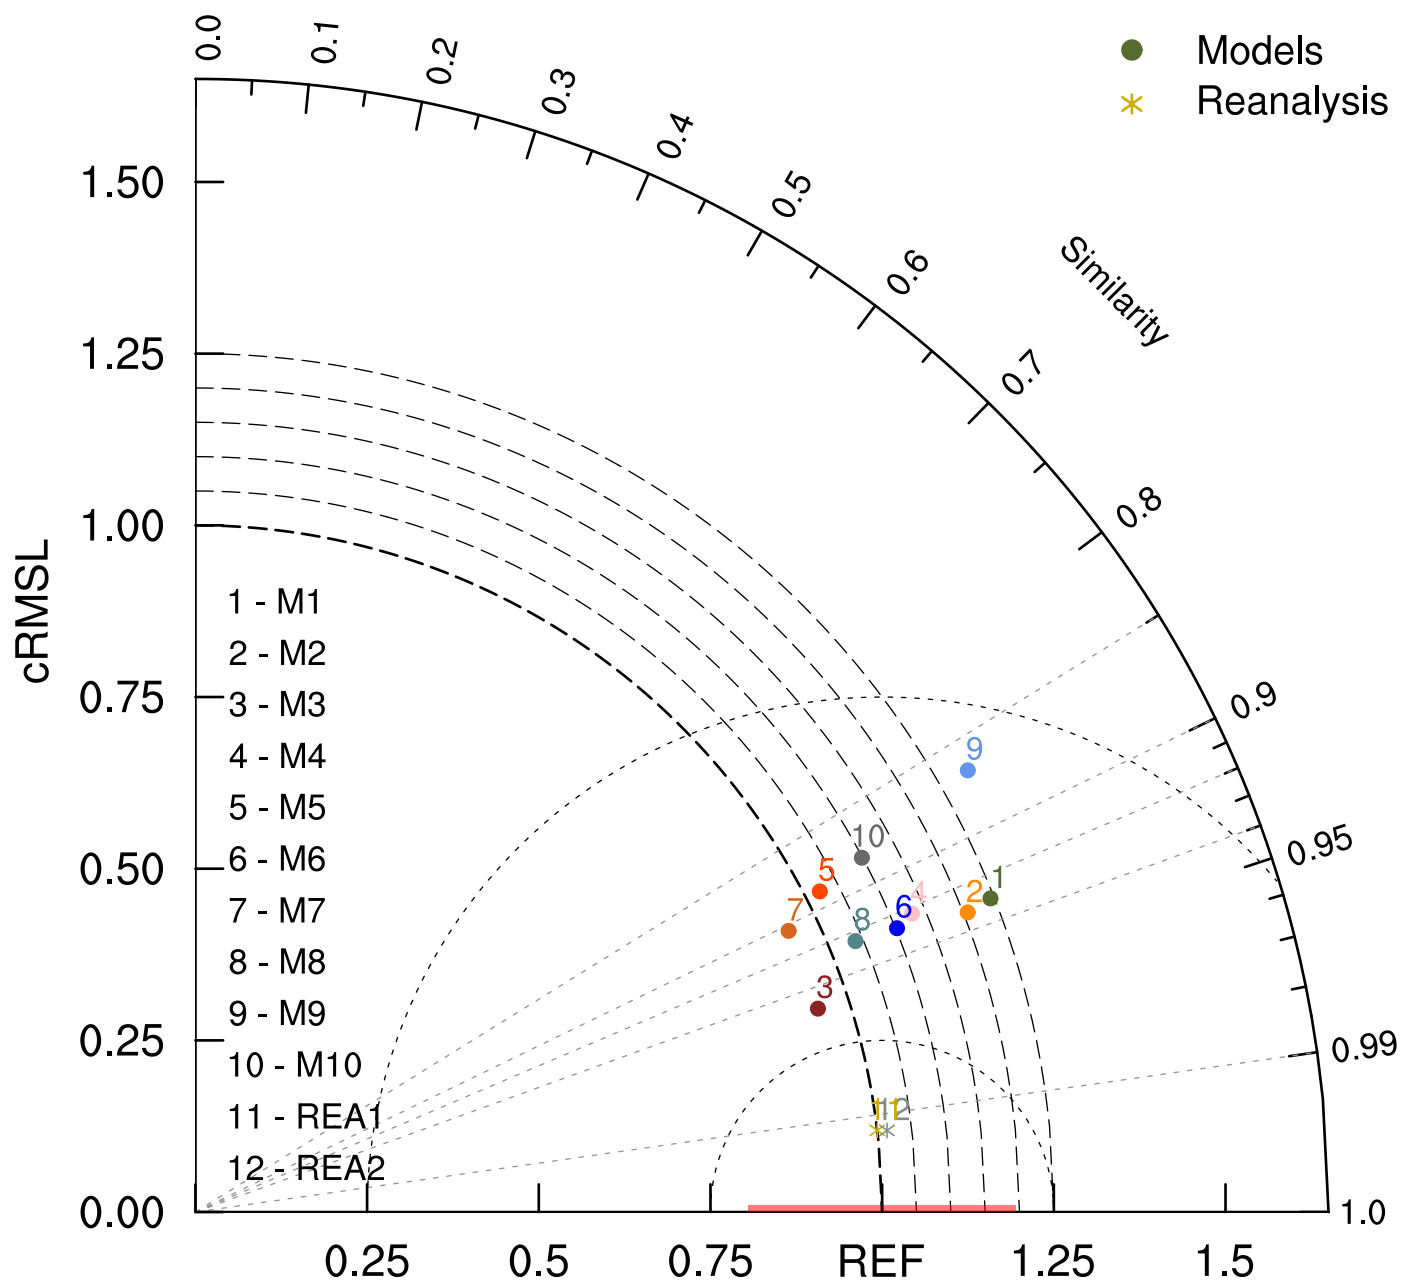

Supplement: Supplementary file 2 [file gmd-14-3079-2021-supplement.zip]

(b)

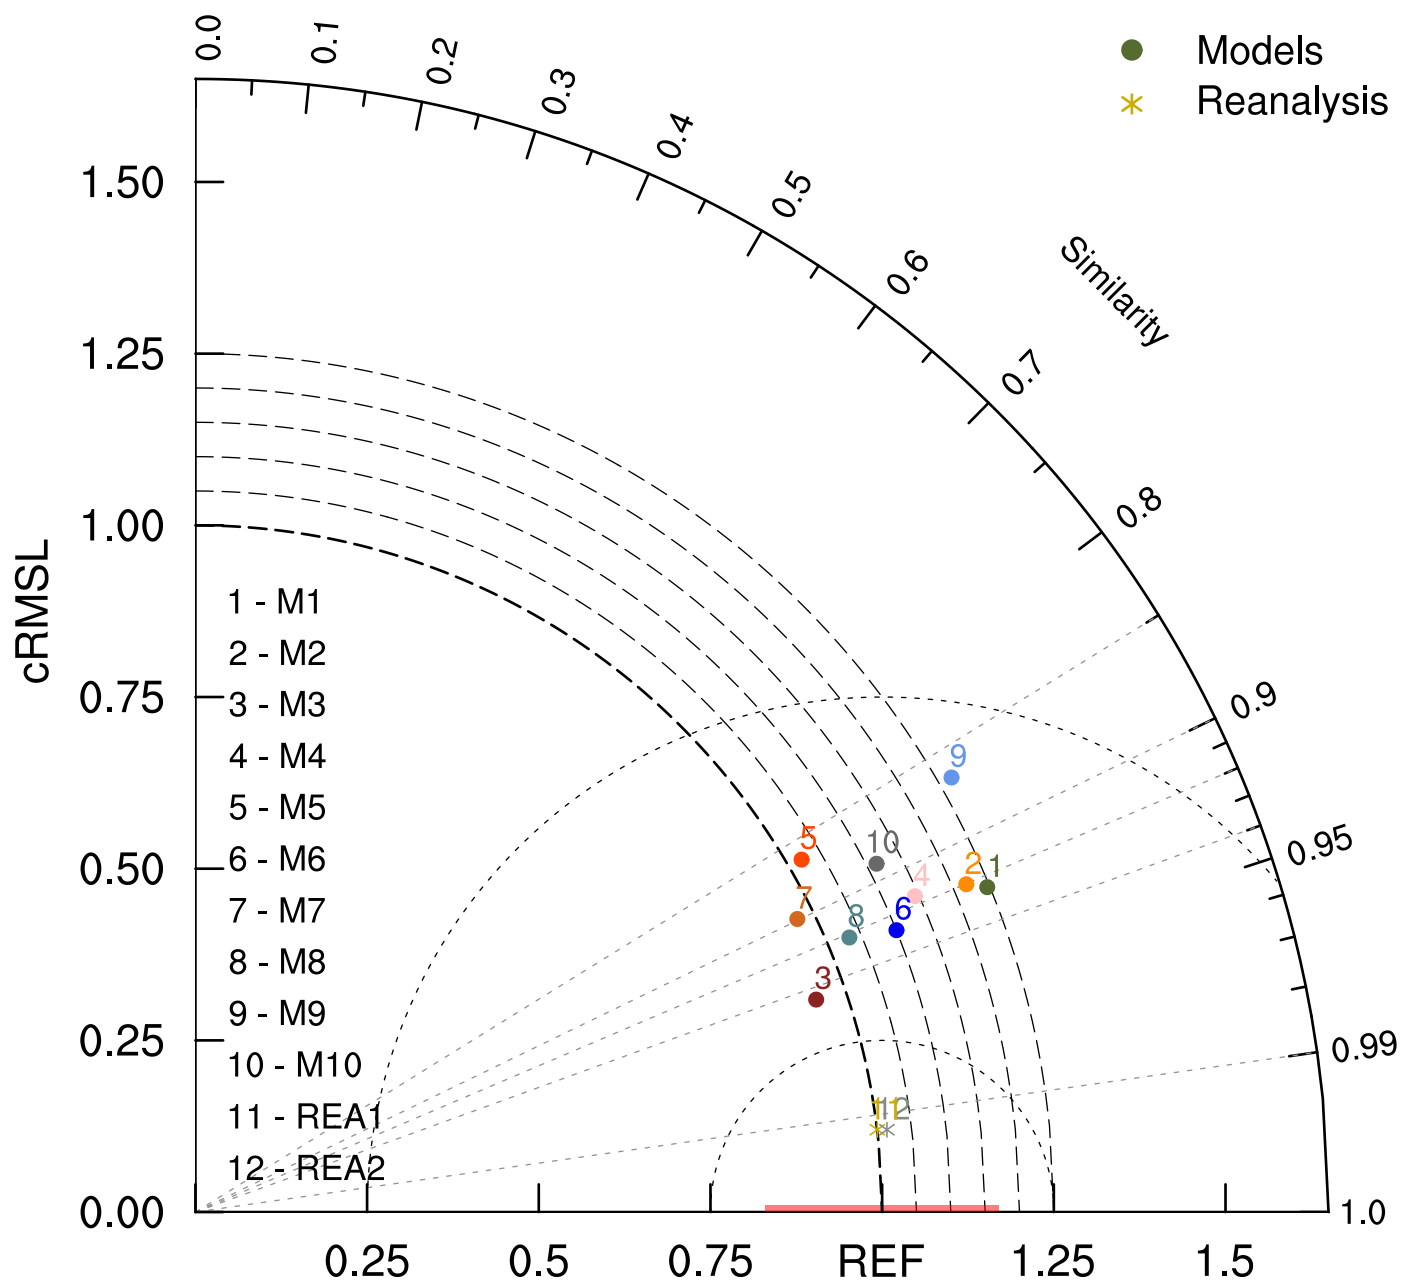

Supplement: Supplementary file 4 [file gmd-14-3079-2021-supplement.zip]
